# Supplementary material
Source: PubMed Central journal article supplement (PMC5339333)
Supplement: mmc1.pdf [file mmc1.pdf]

**Supplemental Data**

**Genetic Regulation of Adipose Gene Expression  
and Cardio-Metabolic Traits**

**Mete Civelek, Ying Wu, Calvin Pan, Chelsea K. Raulerson, Arthur Ko, Aiqing He, Charles Tilford, Niyas K. Saleem, Alena Stančáková, Laura J. Scott, Christian Fuchsberger, Heather M. Stringham, Anne U. Jackson, Narisu Narisu, Peter S. Chines, Kerrin S. Small, Johanna Kuusisto, Brian W. Parks, Päivi Pajukanta, Todd Kirchgessner, Francis S. Collins, Peter S. Gargalovic, Michael Boehnke, Markku Laakso, Karen L. Mohlke, and Aldons J. Lusk**

## SUPPLEMENTAL FIGURES

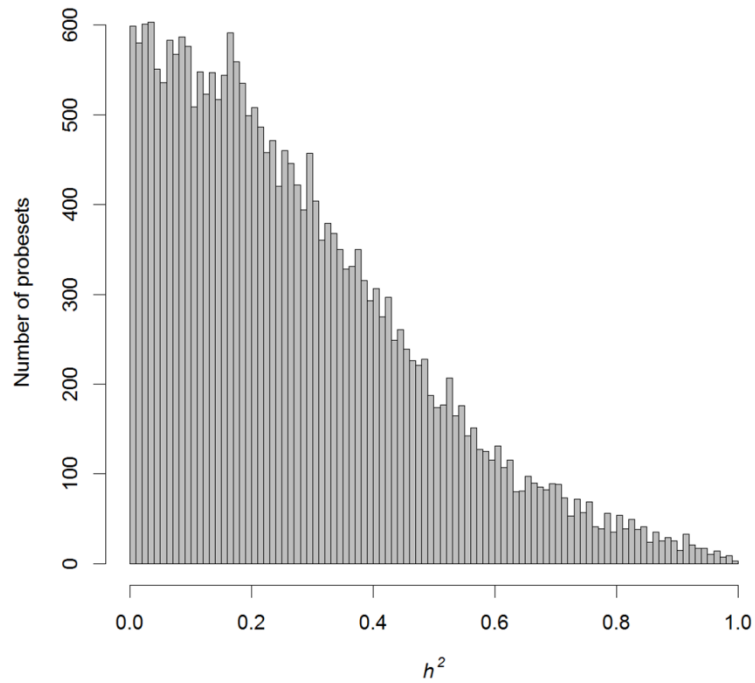

**Figure S1:** Narrow sense heritability ( $h^2$ ) for transcript expression probes.  $h^2$  for each probeset was calculated from the PEER residuals using a variance component method as implemented in the Genome-wide Complex Trait Analysis (GCTA) software<sup>5</sup>. The mean narrow-sense heritability,  $h^2$ , of the 59.8% of probesets with a non-zero estimate was 0.27 (range  $1.4 \times 10^{-5}$  to 0.99, mean standard error = 0.27).

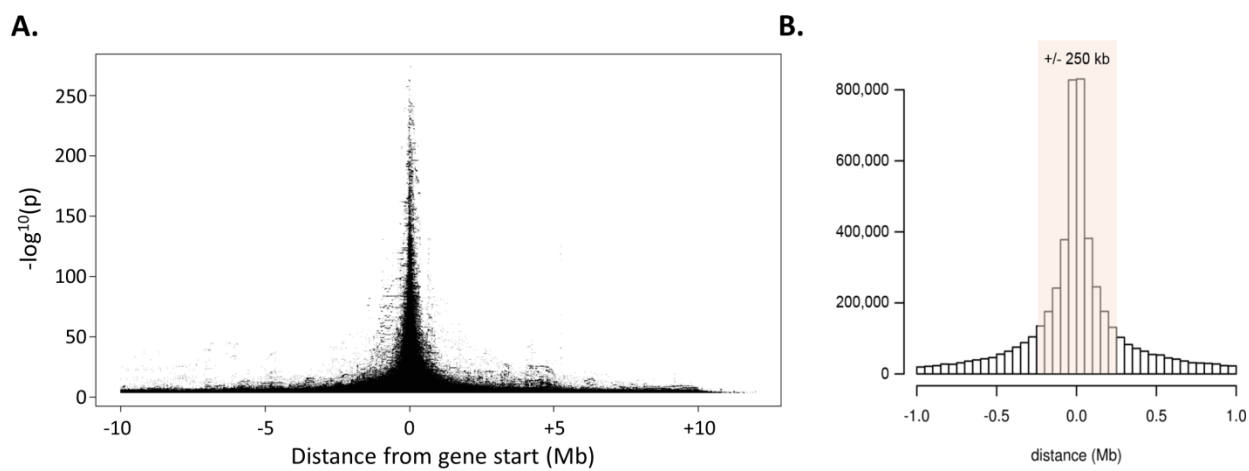

**Figure S2:** Characteristics of  $cis$ -eQTL associations located up to 10 Mb from transcription start sites. **(A)** Association  $P$ -values within 10 Mb of the transcript **(B)** Numbers of variants with  $cis$ -eQTL  $P < 2.46 \times 10^{-4}$  in 50 kb bins within 1 Mb of the transcript. The pink shading indicates  $cis$ -eQTL variants located within 250 kb of the transcript.

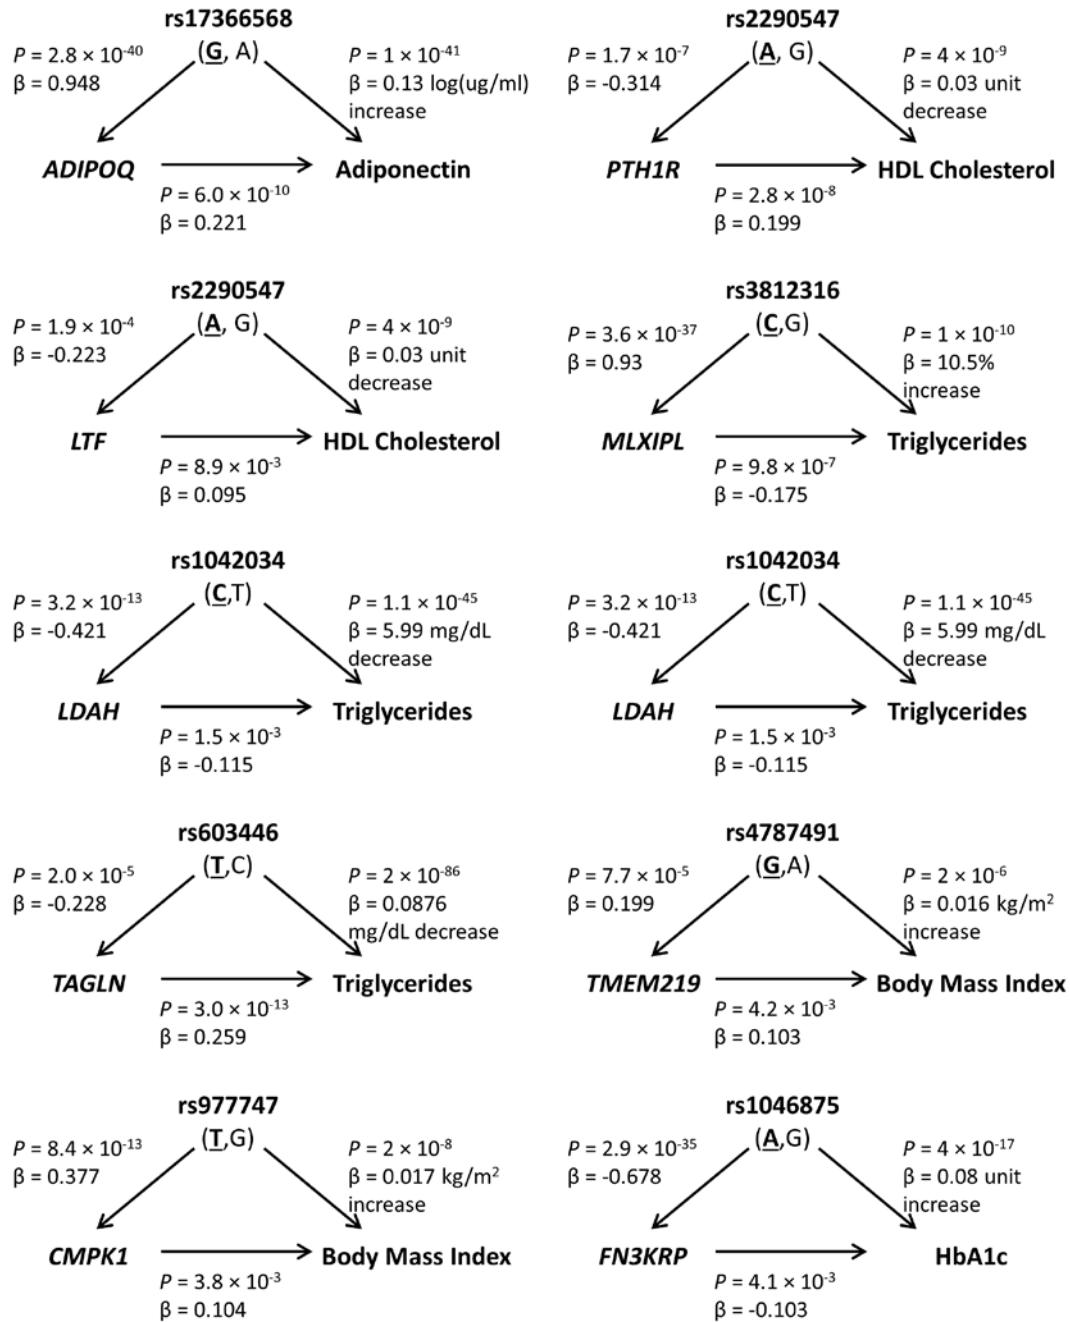

**Figure S3:** Candidate causal genes at select GWAS loci. Associations between the GWAS SNP, gene expression, and trait for which the causal inference test showed evidence of mediation ( $P_{\text{CIT}} < 0.05$ ) are shown. Results of the causal inference test are detailed in supplementary file 4. Direction of effect size is based on the underlined allele.

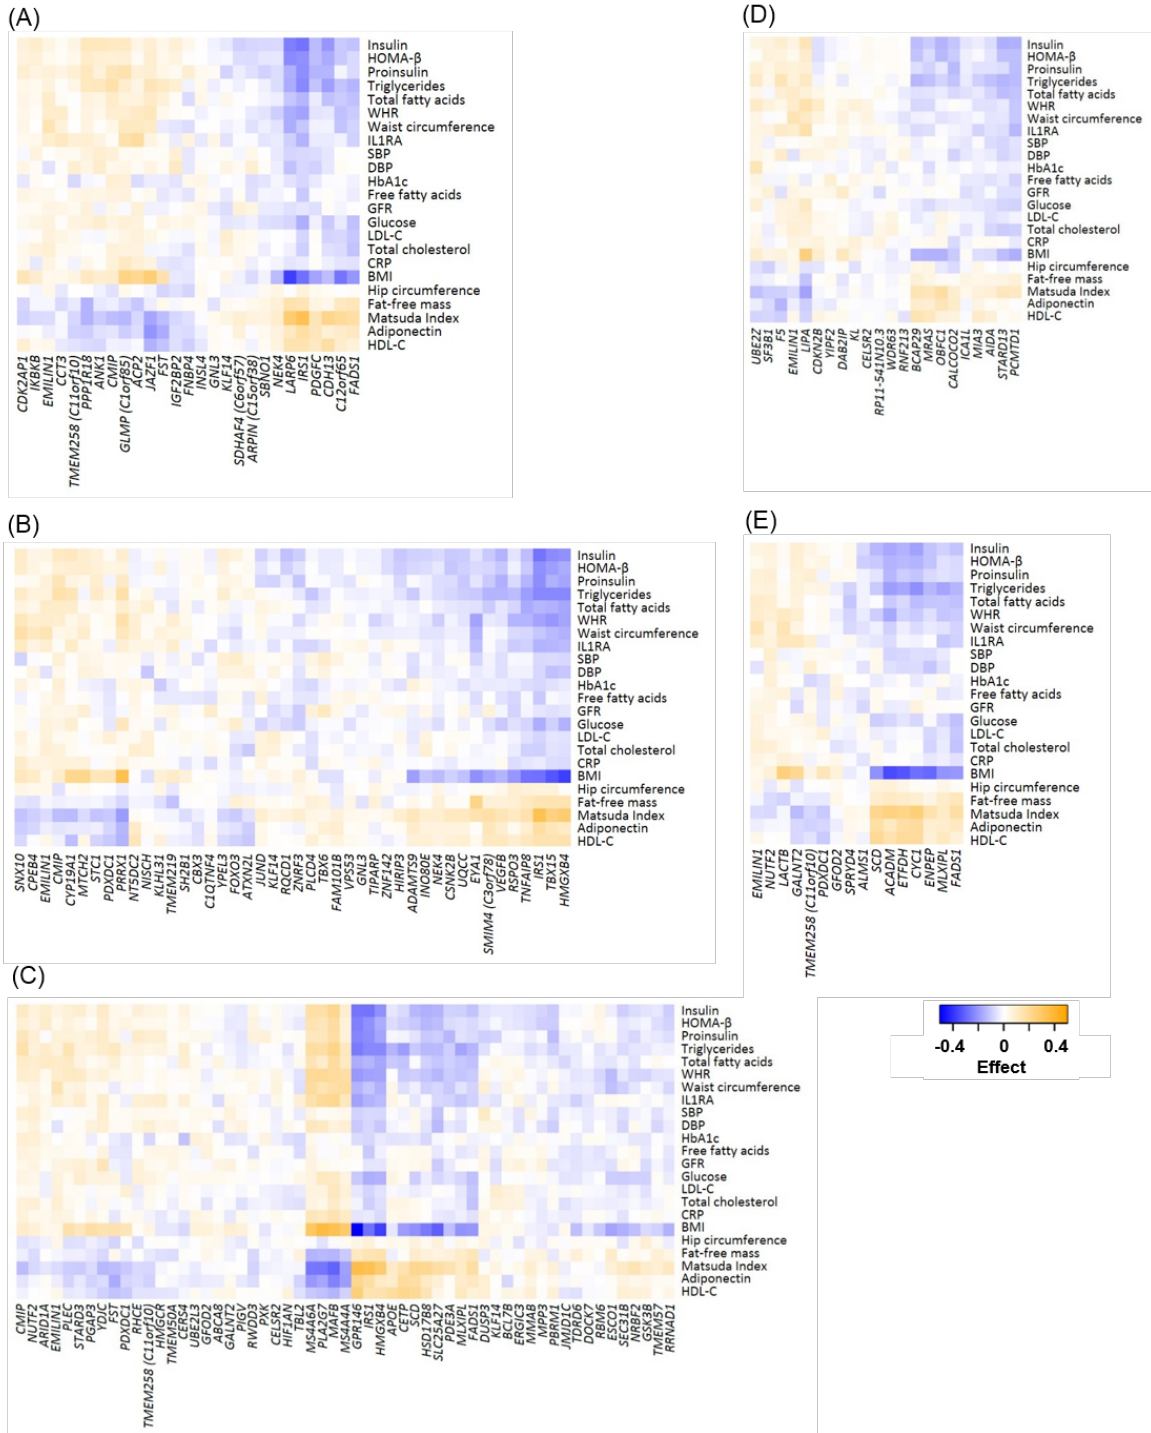

**Figure S4:** Effects of the association between cardiometabolic traits and genes for which the eQTL was coincident with the GWAS signals. Trait association with eQTL genes at GWAS loci for (A) diabetes and glycemic traits, (B) obesity and related traits, (C) lipids, (D) CVD/CHD, and (E) MetS. Orange: positive association; blue: negative association. The effect size scale is the same as that shown in main Figure 2 and 3.

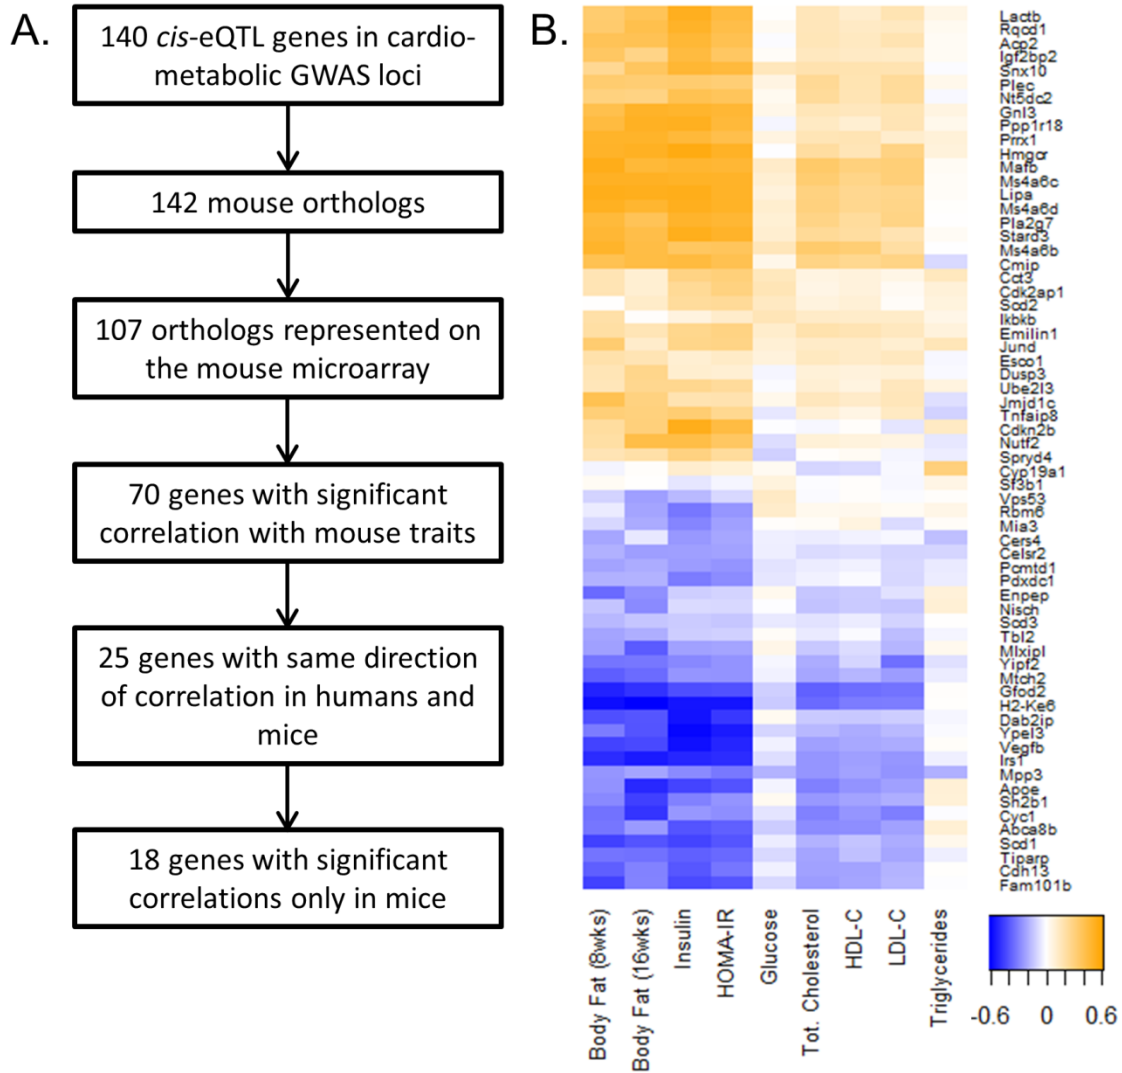

**Figure S5:** Correlation between cardio-metabolic traits and genes in 120 strains from the Hybrid Mouse Diversity Panel. **(A)** Flowchart showing the identification of the overlap of the trait-expression correlations in humans and mice. **(B)** Mouse orthologs are shown for the human *cis*-eQTL genes coincident with GWAS loci. Correlation strength is shown between selected cardio-metabolic traits and adipose tissue expression in males. Expression and phenotype data from Parks *et al*<sup>6,7</sup>.

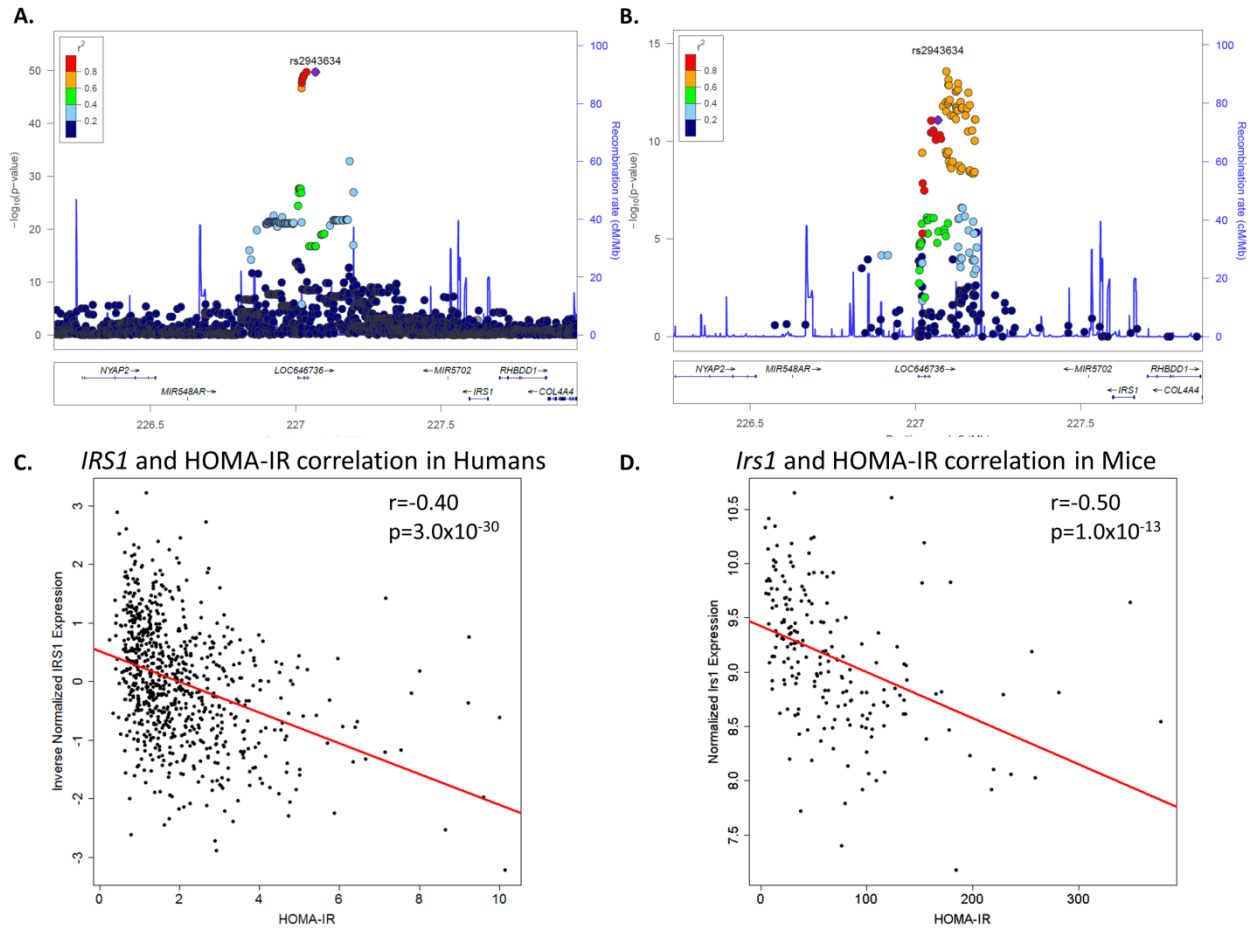

**Figure S6:** Association of variants at chr2q36.3 with *IRS1* expression and insulin resistance in humans and mice. **(A)** Variants associated with *IRS1* expression in the METSIM study. Variants are colored based on LD with the lead eSNP rs2943634 (purple dot) in METSIM. **(B)** Variants associated with type 2 diabetes susceptibility from the DIAGRAM consortium<sup>8</sup>. Variants are colored based on LD with rs2943634. **(C)** Correlation of *IRS1* with a homeostatic model of insulin resistance (HOMA-IR) in humans from the METSIM study. **(D)** Correlation of *Irs1* with HOMA-IR in mice from the HMDP.

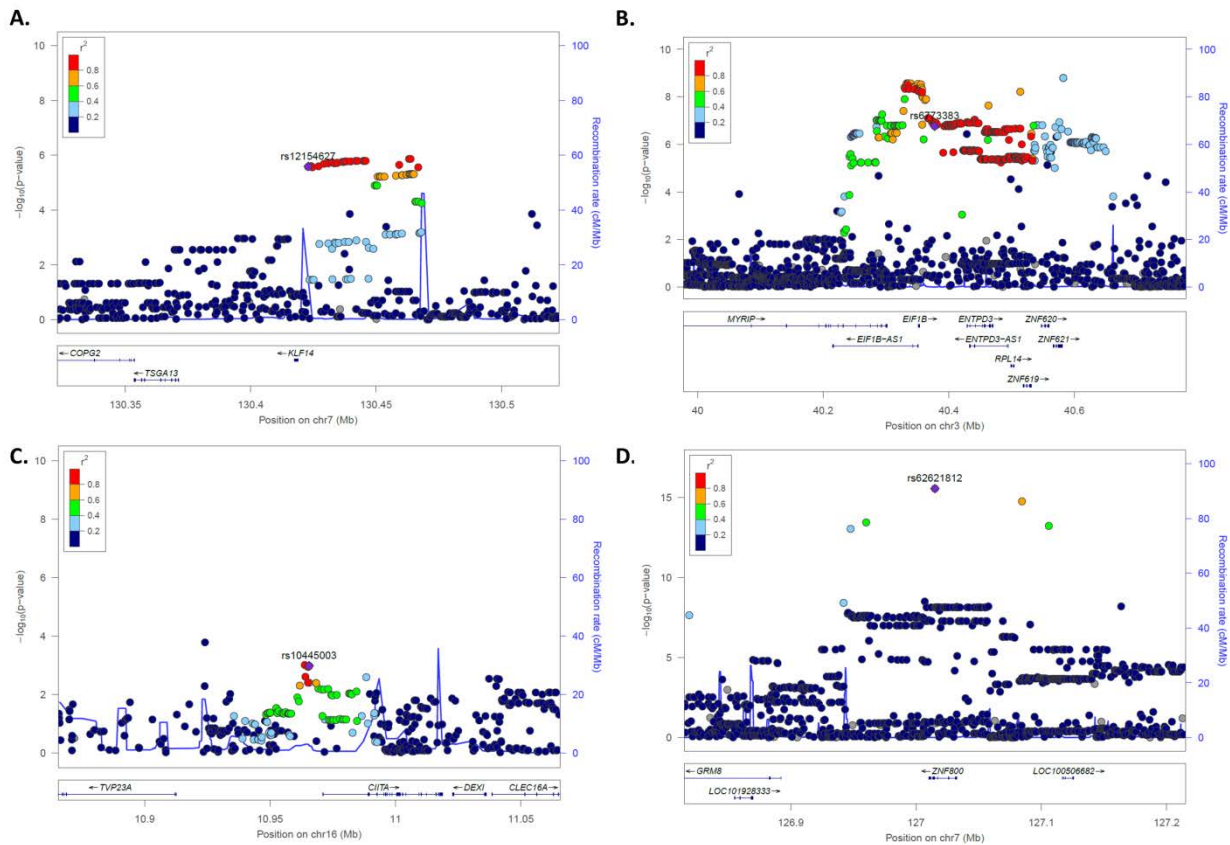

**Figure S7:** *cis*-regulated genes at the *trans*-eQTL hotspot loci. Variants associated with (A) *KLF14*, (B) *SLC25A38* (transcript located at chr3: 39.7 Mb), (C) *CIITA*, (D) *ZNF800* expression in the METSIM study. Variants are colored based on LD with the peak *trans*-eQTL variant, which is colored in purple.



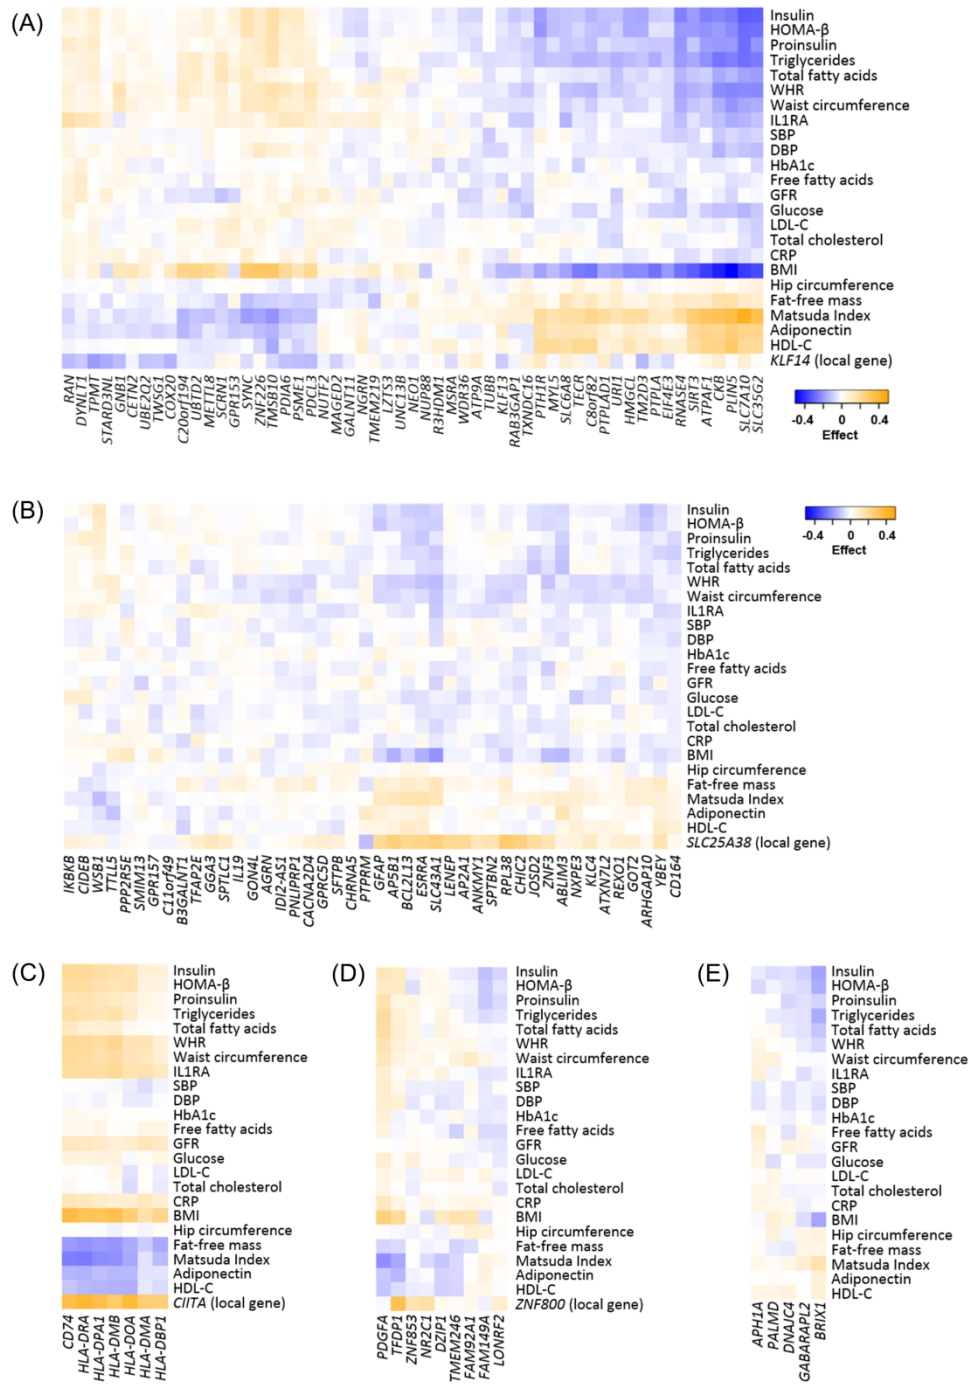

**Figure S8:** Heat map of effect sizes for associations ( $P < 0.05$ ) between the expression of target genes at *trans*-eQTL hotspots and cardio-metabolic trait levels. (A) *KLF14* locus, (B) *SLC25A38* locus, (C) *CIITA* locus (D) *ZNF800* locus, (E) and *HBB* locus. Rows show 23 selected cardio-metabolic traits and columns show the eQTL genes (and reported GWAS trait at the coincident locus). Negative values (blue) indicate that increased gene expression level was associated with decreased trait level, while positive values (orange) indicate that increased gene expression level was associated with increased trait level.

**SUPPLEMENTAL TABLES**

**Table S1:** Characteristics of the 770 METSIM study participants

| <b>Abbreviation</b> | <b>Metabolic trait</b>                                         | <b>Mean ± standard deviation</b> | <b>Median (25th, 75th percentile)</b> |
|---------------------|----------------------------------------------------------------|----------------------------------|---------------------------------------|
| Age                 | Age (years)                                                    | 54.8 ± 5.1                       | 54.0 (51.0, 59.0)                     |
| BMI                 | Body mass index (kg/m <sup>2</sup> )                           | 26.6 ± 3.5                       | 26.2 (24.4, 28.4)                     |
| WHR                 | Waist-to-hip ratio                                             | 0.96 ± 0.06                      | 0.96 (0.92, 1.00)                     |
| WC                  | Waist circumference (cm)                                       | 96.6 ± 9.5                       | 95.0 (90.0, 102.0)                    |
| HIP                 | Hip circumference (cm)                                         | 100.5 ± 6.2                      | 100.0 (97.0, 104.0)                   |
| FFMASS              | Fat-free mass (%)                                              | 78.8 ± 5.1                       | 79.4 (76.3, 82.0)                     |
| TotFA               | Total fatty acids (mmol/l)                                     | 11.9 ± 3.1                       | 11.3 (9.9, 13.2)                      |
| FFA                 | Fasting plasma free fatty acid (mmol/l)                        | 0.36 ± 0.14                      | 0.34 (0.25, 0.43)                     |
| TG                  | Total triglycerides (mmol/l)                                   | 1.41 ± 0.95                      | 1.19 (0.87, 1.64)                     |
| CHOL                | Total cholesterol (mmol/l)                                     | 5.50 ± 0.88                      | 5.42 (4.87, 6.10)                     |
| LDL-C               | LDL cholesterol (mmol/l)                                       | 3.48 ± 0.77                      | 3.40 (2.90, 3.97)                     |
| HDL-C               | HDL cholesterol (mmol/l)                                       | 1.49 ± 0.39                      | 1.44 (1.21, 1.69)                     |
| Adiponectin         | Plasma adiponectin (ug/ml)                                     | 7.5 ± 3.5                        | 6.7 (4.2, 9.6)                        |
| Matsuda             | Matsuda composite insulin sensitivity index (mg/dl, mU/l)      | 7.3 ± 4.3                        | 6.4 (4.2, 9.6)                        |
| HOMA-B              | Insulin resistance index based on homeostasis model assessment | 68.1 ± 41.3                      | 57.1 (40.8, 82.2)                     |
| Glucose             | Fasting plasma glucose (mmol/l)                                | 5.8 ± 0.6                        | 5.7 (5.4, 6.0)                        |
| Insulin             | Fasting plasma insulin (mU/l)                                  | 45.9 ± 29.3                      | 37.2 (25.8, 58.8)                     |
| Proinsulin          | Fasting plasma proinsulin (pmol/l)                             | 13.2 ± 6.3                       | 11.9 (9.3, 15.3)                      |
| HbA1c               | Blood glycated HbA1c (%)                                       | 5.6 ± 0.4                        | 5.6 (5.4, 5.8)                        |
| SBP                 | Systolic blood pressure (mm Hg)                                | 134.7 ± 14.4                     | 133.3 (124.0, 142.0)                  |
| DBP                 | Diastolic blood pressure (mm Hg)                               | 87.4 ± 8.8                       | 87.3 (80.7, 92.7)                     |
| CRP                 | High sensitivity C-reactive protein (mg/l)                     | 1.8 ± 3.1                        | 1.0 (0.5, 2.1)                        |
| IL1RA               | Interleukin-1 receptor antagonist (pg/ml)                      | 200.0 ± 124.8                    | 170.4 (128.2, 235.9)                  |
| GFR                 | Glomerular filtration rate                                     | 0.09 ± 0.01                      | 0.09 (0.08, 0.10)                     |
|                     |                                                                | <b>YES</b>                       | <b>NO</b>                             |
| T2D                 | Type 2 diabetes                                                | 27                               | 743                                   |
| IGT                 | Impaired glucose tolerance                                     | 61                               | 682                                   |

**Table S2:** Discovery of *cis*- and *trans*-eQTL genes on chromosome 7 with different numbers of PEER factors

| Number of PEER factors (Nk) | Number of <i>cis</i> -eQTL genes on chr7 (FDR < 1%) | Number of <i>trans</i> -eQTL genes associated with <i>KLF14</i> variant rs4731702 ( $P < 5 \times 10^{-8}$ ) |
|-----------------------------|-----------------------------------------------------|--------------------------------------------------------------------------------------------------------------|
| 10                          | 572                                                 | 28                                                                                                           |
| 15                          | 593                                                 | 36                                                                                                           |
| 20                          | 605                                                 | 41                                                                                                           |
| 25                          | 608                                                 | 43                                                                                                           |
| 30                          | 610                                                 | 51                                                                                                           |
| 35                          | 612                                                 | 50                                                                                                           |
| 40                          | 616                                                 | 45                                                                                                           |
| 45                          | 613                                                 | 32                                                                                                           |
| 50                          | 610                                                 | 27                                                                                                           |

To optimize the discovery of both *cis*- and *trans*-eQTLs, we compared the number of *cis*- and *trans*-eQTL genes on chromosome 7 from the association analysis for PEER-processed residuals of transcript levels by setting the number of inferred PEER factors (Nk) at 10, 15, 20, 25, 30, 35, 40, 45, and 50. *Cis*-eQTLs were defined as the distance between the variant and associated genes < 1 Mb and FDR < 1%. The number of *trans*-eQTL genes was only counted for associated genes ( $P < 5 \times 10^{-8}$ ) located > 5 Mb away or on a different chromosome from the *KLF14* locus on chromosome 7<sup>1</sup>. Association tests for this set of pilot eQTL analyses were performed using Matrix-eQTL.

**Table S3:** Discovery of *cis*- and *trans*-eQTLs in METSIM adipose tissue

|                                                  | <i>cis</i> associations | <i>trans</i> associations |
|--------------------------------------------------|-------------------------|---------------------------|
| Number of variant-probeset pairs                 | 5,006,029               | 11,053                    |
| Number of variant-gene pairs                     | 3,265,851               | 10,294                    |
| Number of variants associated with $\geq 1$ gene | 710,325                 | 4,082                     |
| Number of associated probe sets                  | 24,375                  | 121                       |
| Number of associated genes                       | 12,400                  | 90                        |

*cis*- and *trans*-eQTLs were defined based on the distance between the gene boundary and the significantly associated variant location. Variants with minor allele frequency (MAF)  $\geq 0.01$  associated with the transcript level of a gene at FDR  $< 1\%$  were considered. The *P*-value corresponding to a 1% FDR for *cis* associations is  $2.46 \times 10^{-4}$ . *Trans* associations were determined at the Bonferroni-corrected *P*-value of  $1.51 \times 10^{-13}$ .

**Table S4:** List of cardio-metabolic diseases and related quantitative traits for which GWAS loci were examined

| <b>Trait group</b> | <b>Trait from the GWAS catalog</b>                        |
|--------------------|-----------------------------------------------------------|
| diabetes           | Type 2 diabetes                                           |
| diabetes           | Diabetes (gestational)                                    |
| diabetes           | Type 2 diabetes and other traits                          |
| glycemic           | Adiponectin levels                                        |
| glycemic           | Fasting glucose-related traits                            |
| glycemic           | Fasting glucose-related traits (interaction with BMI)     |
| glycemic           | Fasting insulin-related traits                            |
| glycemic           | Fasting insulin-related traits (interaction with BMI)     |
| glycemic           | Fasting plasma glucose                                    |
| glycemic           | Glycated hemoglobin levels                                |
| glycemic           | Glycemic traits                                           |
| glycemic           | Insulin-related traits                                    |
| glycemic           | Proinsulin levels                                         |
| glycemic           | Two-hour glucose challenge                                |
| obesity            | Adiposity                                                 |
| obesity            | BMI                                                       |
| obesity            | Body mass index                                           |
| obesity            | Body mass (lean)                                          |
| obesity            | HIP                                                       |
| obesity            | HIPadjBMI                                                 |
| obesity            | Obesity                                                   |
| obesity            | Obesity (early onset extreme)                             |
| obesity            | Obesity (extreme)                                         |
| obesity            | Obesity-related traits                                    |
| obesity            | Visceral adipose tissue/subcutaneous adipose tissue ratio |
| obesity            | Visceral fat                                              |
| obesity            | Waist circumference                                       |
| obesity            | Waist circumference and related phenotypes                |
| obesity            | Waist Circumference - Triglycerides (WC-TG)               |
| obesity            | Waist-hip ratio                                           |
| obesity            | WCadjBMI                                                  |
| obesity            | Weight                                                    |
| obesity            | WHR                                                       |

|         |                                                                                       |
|---------|---------------------------------------------------------------------------------------|
| obesity | WHRadjBMI                                                                             |
| lipids  | Apolipoprotein Levels                                                                 |
| lipids  | Cholesterol                                                                           |
| lipids  | Cholesterol total                                                                     |
| lipids  | HDL cholesterol                                                                       |
| lipids  | HDL Cholesterol - Triglycerides (HDLC-TG)                                             |
| lipids  | Hypertriglyceridemia                                                                  |
| lipids  | LDL cholesterol                                                                       |
| lipids  | LDL (oxidized)                                                                        |
| lipids  | Lipid metabolism phenotypes                                                           |
| lipids  | Lipid traits                                                                          |
| lipids  | Lipoprotein-associated phospholipase A2 activity and mass                             |
| lipids  | Lipoprotein-associated phospholipase A2 activity change in response to statin therapy |
| lipids  | Oleic acid (18:1n-9) plasma levels                                                    |
| lipids  | Palmitic acid (16:0) plasma levels                                                    |
| lipids  | Palmitoleic acid (16:1n-7) plasma levels                                              |
| lipids  | Phospholipid levels (plasma)                                                          |
| lipids  | Phytosterol levels                                                                    |
| lipids  | Plasminogen activator inhibitor type 1 levels (PAI-1)                                 |
| lipids  | Resistin levels                                                                       |
| lipids  | Sphingolipid levels                                                                   |
| lipids  | Stearic acid (18:0) plasma levels                                                     |
| lipids  | Triglycerides                                                                         |
| lipids  | Triglycerides-Blood Pressure (TG-BP)                                                  |
| MetS    | Metabolic syndrome                                                                    |
| MetS    | Metabolic syndrome (bivariate traits)                                                 |
| MetS    | Metabolic traits                                                                      |
| CVD/CHD | Abdominal aortic aneurysm                                                             |
| CVD/CHD | Ankle-brachial index                                                                  |
| CVD/CHD | Aortic root size                                                                      |
| CVD/CHD | Aortic stiffness                                                                      |
| CVD/CHD | Aortic-valve calcification                                                            |
| CVD/CHD | Arterial stiffness                                                                    |
| CVD/CHD | Cardiac hypertrophy                                                                   |
| CVD/CHD | Cardiac structure and function                                                        |

|         |                                                                     |
|---------|---------------------------------------------------------------------|
| CVD/CHD | Cardiac Troponin-T levels                                           |
| CVD/CHD | Cardiovascular disease risk factors                                 |
| CVD/CHD | Cardiovascular heart disease in diabetics                           |
| CVD/CHD | Carotid atherosclerosis in HIV infection                            |
| CVD/CHD | Carotid intima media thickness                                      |
| CVD/CHD | Coronary arterial lesions in patients with Kawasaki disease         |
| CVD/CHD | Coronary artery calcification                                       |
| CVD/CHD | Coronary heart disease                                              |
| CVD/CHD | Hypertension                                                        |
| CVD/CHD | Hypertension risk in short sleep duration                           |
| CVD/CHD | Intracranial aneurysm                                               |
| CVD/CHD | Lp(a) levels                                                        |
| CVD/CHD | Moyamoya disease                                                    |
| CVD/CHD | Myocardial infarction                                               |
| CVD/CHD | Myocardial infarction (early onset)                                 |
| CVD/CHD | Pulmonary arterial hypertension (without BMPR2 mutations)           |
| CVD/CHD | Stroke                                                              |
| CVD/CHD | Stroke (ischemic)                                                   |
| CVD/CHD | Thiazide-induced adverse metabolic effects in hypertensive patients |
| CVD/CHD | Thoracic aortic aneurysms and dissections                           |
| CVD/CHD | Vascular dementia                                                   |
| CVD/CHD | Venous thromboembolism                                              |
| CVD/CHD | Venous thromboembolism (gene x gene interaction)                    |

---

**Table S5:** GWAS summary results used in the summary-data-based Mendelian randomization method analysis

**Table S5 is an online Excel file (Table S5.xlsx)**



**Table S6** Comparison of previous adipose eQTL studies to the METSIM study

| <b>Study</b>                                 | <b>deCODE</b>                                           | <b>MGH</b>                                             | <b>MuTHER</b>                                                   | <b>METSIM</b>                                           |
|----------------------------------------------|---------------------------------------------------------|--------------------------------------------------------|-----------------------------------------------------------------|---------------------------------------------------------|
| Number of participants                       | 585                                                     | 701                                                    | 855 twins                                                       | 770                                                     |
| Sex ratio (Female:Male)                      | 60:40                                                   | 75:25                                                  | 100:00                                                          | 0:100                                                   |
| Genotyping platform                          | Illumina                                                | Illumina 650Y chip                                     | Illumina HumanHap300, HumanHap610Q, 1M-Duo and 1.2MDuo 1M chips | Illumina OmniExpress chip                               |
| Imputation                                   | NA                                                      | HapMap2                                                | HapMap2                                                         | Haplotype Reference Consortium                          |
| Number of variants tested                    | 1,732 microsatellite markers                            | 2,529,766 variants                                     | 2,029,988 variants                                              | 7,677,356 variants                                      |
| Minor allele frequency threshold             | NA                                                      | NA                                                     | 5%                                                              | 1%                                                      |
| Association method                           | score statistic for a Gaussian variance component model | Kruskal-Wallis test with correction for covariates     | two-step mixed model-based score test                           | linear mixed model                                      |
| Software                                     | SOLAR 2.0                                               | Matlab                                                 | GenABEL/ProbABEL                                                | FaST-LMM and EPACTS                                     |
| Expression array                             | Agilent custom array                                    | Agilent custom array                                   | Illumina HT12 v3.0                                              | Affymetrix U219                                         |
| Number of transcripts                        | 20,877                                                  | 39,303                                                 | 23,423                                                          | 43,145                                                  |
| Number of genes                              | NA                                                      | NA                                                     | NA                                                              | 18,155                                                  |
| Expression heterogeneity removal             | removal of known covariates                             | 19 principal components identified from control probes | none                                                            | Probabilistic estimation of expression residuals (k=35) |
| <i>cis</i> -eQTL <i>P</i> -value threshold   | 5% FDR                                                  | 10% FDR                                                | $5 \times 10^{-5}$ (1% FDR)                                     | $2.46 \times 10^{-4}$ (1% FDR)                          |
| <i>trans</i> -eQTL <i>P</i> -value threshold | 5% FDR                                                  | 10% FDR                                                | $5 \times 10^{-8}$ (10% FDR)                                    | $1.51 \times 10^{-13}$                                  |
| Number of transcripts with eQTLs             | 820 <i>cis</i> ; 25 <i>trans</i>                        | 15,241 <i>cis</i> and <i>trans</i>                     | 3,523 <i>cis</i> ; 595 <i>trans</i>                             | 24,375 <i>cis</i> ; 121 <i>trans</i>                    |
| Number of genes with eQTLs                   | NA                                                      | 9,931 <i>cis</i> and <i>trans</i>                      | NA                                                              | 12,400 <i>cis</i> ; 90 <i>trans</i>                     |
| Citation                                     | Emilsson et al (2008) <sup>2</sup>                      | Greenawalt et al (2011) <sup>3</sup>                   | Grundberg et al (2012) <sup>4</sup>                             | current study                                           |

**Table S7:** Comparison of adipose eQTLs identified in the METSIM and MuTHER cohorts

| Discovery Study                                  | Comparison study | Number of eQTLs in the discovery study | Number of these eQTLs available in the comparison study | P-value threshold  |                    |                    |                    |                    |
|--------------------------------------------------|------------------|----------------------------------------|---------------------------------------------------------|--------------------|--------------------|--------------------|--------------------|--------------------|
|                                                  |                  |                                        |                                                         | $5 \times 10^{-2}$ | $5 \times 10^{-3}$ | $5 \times 10^{-4}$ | $5 \times 10^{-5}$ | $5 \times 10^{-6}$ |
| <b>Number of <i>cis</i>-eQTLs observed (%)</b>   |                  |                                        |                                                         |                    |                    |                    |                    |                    |
| METSIM                                           | MuTHER           | 12,400                                 | 5,162                                                   | 4,421<br>(85.6%)   | 3,186<br>(61.7%)   | 2,378<br>(46.1%)   | 1,922<br>(37.2%)   | 1,550<br>(30.0%)   |
| MuTHER                                           | METSIM           | 3,142                                  | 2,279                                                   | 2,128<br>(93.0%)   | 2,042<br>(89.6%)   | 1,939<br>(85.1%)   | 1,870<br>(82.0%)   | 1,802<br>(79.1%)   |
| <b>Number of <i>trans</i>-eQTLs observed (%)</b> |                  |                                        |                                                         |                    |                    |                    |                    |                    |
| METSIM                                           | MuTHER           | 90                                     | 41                                                      | 18<br>(43.9%)      | 14<br>(34.1%)      | 12<br>(29.3%)      | 11<br>(26.8%)      | 5<br>(12.2%)       |
| MuTHER                                           | METSIM           | 639                                    | 517                                                     | 63<br>(12.2%)      | 14<br>(2.7%)       | 0<br>(0%)          | 0<br>(0%)          | 0<br>(0%)          |

The total number of eQTLs is the number identified in the discovery study at FDR<1%. Of these, the eQTLs available are those for which the replication study data included a probeset for the same gene and had the same variant available. The *P*-value threshold columns report the discovery study eQTLs observed in the replication study at or exceeding that significance threshold and in the same observed direction of effect.

**Table S8:** Adipose eQTLs identified at GWAS loci for cardiometabolic diseases and traits

**Table S8 is an online Excel file (Table S8.xlsx)**

**Table S9:** Results of the summary-data-based Mendelian randomization (SMR) analysis. Source of the GWAS summary results are given in Table S5

**Table S9 is an online Excel file (Table S9.xlsx)**

**Table S10:** Results of the causal inference test (CIT). CIT was performed for the GWAS index SNP, expression of the *cis*-eQTL gene, and inverse-normalized traits measured in the METSIM population

**Table S10 is an online Excel file (Table S10.xlsx)**

**Table S11:** Association of gene expression and cardio-metabolic traits

**Table S11 is an online Excel file (Table S11.xlsx)**

**Table S12:** Number of probesets and genes associated with each of the 23 cardiometabolic-related traits.

| <b>Traits</b>                     | <b>Number of associated probesets</b> | <b>Number of associated genes</b> |
|-----------------------------------|---------------------------------------|-----------------------------------|
| Body mass index (BMI)             | 10,819                                | 6,064                             |
| Matsuda insulin sensitivity index | 6,640                                 | 3,940                             |
| Insulin                           | 4,933                                 | 3,039                             |
| Triglycerides                     | 4,103                                 | 2,553                             |
| HOMA- $\beta$                     | 3,340                                 | 2,126                             |
| Adiponectin                       | 3,003                                 | 1,894                             |
| Wasit-to-hip ratio (WHR)          | 2,880                                 | 1,790                             |
| HDL cholesterol (HDL-C)           | 2,574                                 | 1,660                             |
| Proinsulin                        | 2,487                                 | 1,618                             |
| IL1 receptor antagonist (IL1RA)   | 1,882                                 | 1,250                             |
| Fat free mass (FFM)               | 1,641                                 | 1,103                             |
| Waist circumference (WC)          | 1,387                                 | 892                               |
| Total fatty acids (TotFA)         | 1,181                                 | 784                               |
| Glucose                           | 386                                   | 312                               |
| Diastolic blood pressure (DBP)    | 364                                   | 275                               |
| Glomerular filtration rate (GFR)  | 272                                   | 234                               |
| C-reactive protein (CRP)          | 164                                   | 121                               |
| Systolic blood pressure (SBP)     | 98                                    | 81                                |
| Free fatty acids (FFA)            | 67                                    | 54                                |
| Total cholesterol                 | 52                                    | 46                                |
| HbA1c                             | 40                                    | 36                                |
| Hip circumference                 | 27                                    | 25                                |
| LDL cholesterol (LDL-C)           | 25                                    | 23                                |
| <b>Total</b>                      | <b>48,365</b>                         | <b>29,920</b>                     |

**Table S13:** METSIM *cis*-eQTLs in GWAS loci for which adipose expression is correlated with similar metabolic traits in the hybrid mouse diversity panel (HMDP)

| Locus                      | METSIM                |         |                             | Direction of correlation | Mouse gene     | HMDP    |                             |             |      |
|----------------------------|-----------------------|---------|-----------------------------|--------------------------|----------------|---------|-----------------------------|-------------|------|
|                            | <i>cis</i> -eQTL gene | Trait   | Association <i>P</i> -value |                          |                | Trait   | Correlation <i>P</i> -value | Correlation | Diet |
| <i>IRS1</i>                | <i>IRS1</i>           | Matsuda | $1.4 \times 10^{-21}$       | +                        | <i>Irs1</i>    | HOMA-IR | $1.0 \times 10^{-13}$       | -0.50       | HF   |
|                            |                       | WHR     | $5.1 \times 10^{-7}$        | -                        |                | BFP     | $1.9 \times 10^{-18}$       | -0.54       | HF   |
|                            |                       | TG      | $9.0 \times 10^{-11}$       | -                        |                |         |                             |             |      |
|                            |                       | Adipo   | $8.8 \times 10^{-7}$        | +                        |                |         |                             |             |      |
|                            |                       | HDL-C   | $1.7 \times 10^{-5}$        | +                        |                |         |                             |             |      |
| <i>MLXIPL</i>              | <i>MLXIPL</i>         | TG      | $9.8 \times 10^{-7}$        | -                        | <i>Mlxipl</i>  | SqFP    | $2.6 \times 10^{-11}$       | -0.42       | HF   |
|                            |                       | HDL-C   | $7.2 \times 10^{-4}$        | +                        |                |         |                             |             |      |
| <i>GORAB</i>               | <i>PRRX1</i>          | WHR     | $4.5 \times 10^{-6}$        | +                        | <i>Prrx1</i>   | BFP     | $6.6 \times 10^{-22}$       | 0.58        | HF   |
| <i>LACTB</i>               | <i>LACTB</i>          | Waist   | $5.8 \times 10^{-5}$        | +                        | <i>Lactb</i>   | SqFP    | $2.5 \times 10^{-12}$       | 0.44        | HF   |
| <i>ENPEP</i>               | <i>ENPEP</i>          | Matsuda | $1.0 \times 10^{-5}$        | +                        | <i>Enpep</i>   | BFP     | $6.2 \times 10^{-8}$        | -0.35       | HF   |
|                            |                       | TG      | $1.0 \times 10^{-4}$        | -                        |                |         |                             |             |      |
| <i>SNX10</i>               | <i>SNX10</i>          | WHR     | $3.0 \times 10^{-4}$        | +                        | <i>Snx10</i>   | BFP     | $4.9 \times 10^{-9}$        | 0.38        | HF   |
| <i>MAFB</i>                | <i>MAFB</i>           | LDL-C   | $6.1 \times 10^{-4}$        | +                        | <i>Mafb</i>    | LDL-C   | $1.7 \times 10^{-6}$        | 0.33        | HF   |
| <i>INOS80E</i>             | <i>TMEM219</i>        | BMI     | $4.2 \times 10^{-3}$        | +                        | <i>Tmem219</i> | BFP     | $5.2 \times 10^{-6}$        | 0.45        | Chow |
| <i>CMIP</i>                | <i>CMIP</i>           | WHR     | $9.3 \times 10^{-3}$        | +                        | <i>Cmip</i>    | BFP     | $1.9 \times 10^{-17}$       | 0.52        | HF   |
| <i>AIF1</i>                | <i>CSNK2B</i>         | BMI     | $1.3 \times 10^{-2}$        | -                        | <i>Csnk2b</i>  | BFP     | $4.1 \times 10^{-11}$       | -0.62       | Chow |
| <i>MPHOSPH9</i>            | <i>CDK2AP1</i>        | Matsuda | $1.6 \times 10^{-2}$        | -                        | <i>Cdk2ap1</i> | HOMA-IR | $1.5 \times 10^{-10}$       | 0.44        | HF   |
| <i>NT5DC2</i>              | <i>NT5DC2</i>         | WHR     | $1.8 \times 10^{-2}$        | +                        | <i>Nt5dc2</i>  | SqFP    | $4.4 \times 10^{-7}$        | 0.33        | HF   |
| <i>LEKR1</i>               | <i>TIPARP</i>         | WHR     | $2.6 \times 10^{-2}$        | -                        | <i>Tiparp</i>  | SqFP    | $1.4 \times 10^{-8}$        | -0.37       | HF   |
| <i>MADD</i>                | <i>ACP2</i>           | P_ins   | $3.7 \times 10^{-2}$        | +                        | <i>Acp2</i>    | Ins     | $8.4 \times 10^{-16}$       | 0.53        | HF   |
| <i>GCKR</i>                | <i>EMILIN1</i>        | P_ins   | $5.1 \times 10^{-2}$        | +                        | <i>Emilin1</i> | HOMA-IR | $7.4 \times 10^{-8}$        | 0.37        | HF   |
|                            |                       | Gluc    | $6.5 \times 10^{-2}$        | +                        |                |         |                             |             |      |
|                            |                       | Ins     | $1.2 \times 10^{-1}$        | +                        |                |         |                             |             |      |
| <i>MACROD1</i>             | <i>VEGFB</i>          | WHR     | $1.5 \times 10^{-1}$        | -                        | <i>Vegfb</i>   | SqFP    | $1.8 \times 10^{-14}$       | -0.48       | HF   |
| <i>MPP3</i>                | <i>MPP3</i>           | TG      | $2.1 \times 10^{-1}$        | -                        | <i>Mpp3</i>    | HOMA-IR | $5.8 \times 10^{-6}$        | -0.32       | HF   |
| <i>VPS53</i>               | <i>FAM101B</i>        | Hip     | $2.2 \times 10^{-1}$        | -                        | <i>Fam101b</i> | BFP     | $2.5 \times 10^{-12}$       | -0.44       | HF   |
| <i>JUND</i>                | <i>JUND</i>           | WHR     | $2.3 \times 10^{-1}$        | +                        | <i>Jund</i>    | BFP     | $2.6 \times 10^{-7}$        | 0.33        | HF   |
| <i>USP37</i>               | <i>RQCD1</i>          | BMI     | $4.9 \times 10^{-1}$        | +                        | <i>Rqcd1</i>   | SqFP    | $2.6 \times 10^{-11}$       | 0.42        | HF   |
| <i>B3GALT4</i>             | <i>HSD17B8</i>        | LDL-C   | $5.8 \times 10^{-1}$        | -                        | <i>H2-Ke6</i>  | TC      | $4.8 \times 10^{-7}$        | -0.35       | HF   |
| <i>LCAT</i>                | <i>GFOD2</i>          | HDL-C   | $6.7 \times 10^{-1}$        | -                        | <i>Gfod2</i>   | HDL-C   | $9.5 \times 10^{-7}$        | -0.34       | HF   |
| <i>C1orf85-CCT3-TMEM79</i> | <i>CCT3</i>           | HbA1c   | $6.8 \times 10^{-1}$        | +                        | <i>Cct3</i>    | HOMA-IR | $1.6 \times 10^{-7}$        | 0.36        | HF   |
| <i>INOS80E</i>             | <i>YPEL3</i>          | BMI     | $8.4 \times 10^{-1}$        | -                        | <i>Ypel3</i>   | BFP     | $2.9 \times 10^{-10}$       | -0.4        | HF   |
| <i>GNL3</i>                | <i>GNL3</i>           | WHR     | $9.2 \times 10^{-1}$        | +                        | <i>Gnl3</i>    | SqFP    | $2.8 \times 10^{-13}$       | 0.46        | HF   |

Of 140 METSIM eQTLs coincident with GWAS loci, 107 mouse homologs were available in the HMDP. The table shows the genes for which mouse adipose tissue expression was correlated ( $P < 5.2 \times 10^{-5}$ ) with a similar metabolic trait in the same direction. Matsuda, Matsuda index; WHR, waist-to-hip ratio; TG, triglycerides; Adipo,

adiponectin; HDL-C, high density lipoprotein cholesterol; Waist, waist circumference; LDL-C, low density lipoprotein cholesterol; BMI, body mass index; P\_ins, proinsulin; Gluc, glucose; Ins, insulin; Hip, hip circumference; HbA1c, glycated hemoglobin; BFP, body fat percentage; SqFP, subcutaneous fat percentage; TC, total cholesterol; HF, high fat diet

**Table S14:** Trans-eQTL hotspots identified in METSIM adipose tissue and their look ups in the MuTHER cohort (red color indicates cis regulated gene in the locus)

**Table S14 is an online Excel file (Table S14.xlsx)**

## SUPPLEMENTAL REFERENCES

1. Small, K.S., Hedman, A.K., Grundberg, E., Nica, A.C., Thorleifsson, G., Kong, A., Thorsteindottir, U., Shin, S.Y., Richards, H.B., Consortium, G., et al. (2011). Identification of an imprinted master *trans* regulator at the KLF14 locus related to multiple metabolic phenotypes. *Nat Genet* 43, 561-564.
2. Emilsson, V., Thorleifsson, G., Zhang, B., Leonardson, A.S., Zink, F., Zhu, J., Carlson, S., Helgason, A., Walters, G.B., Gunnarsdottir, S., et al. (2008). Genetics of gene expression and its effect on disease. *Nature* 452, 423-428.
3. Greenawalt, D.M., Dobrin, R., Chudin, E., Hatoum, I.J., Suver, C., Beaulaurier, J., Zhang, B., Castro, V., Zhu, J., Sieberts, S.K., et al. (2011). A survey of the genetics of stomach, liver, and adipose gene expression from a morbidly obese cohort. *Genome Res* 21, 1008-1016.
4. Grundberg, E., Small, K.S., Hedman, A.K., Nica, A.C., Buil, A., Keildson, S., Bell, J.T., Yang, T.P., Meduri, E., Barrett, A., et al. (2012). Mapping *cis*- and *trans*-regulatory effects across multiple tissues in twins. *Nat Genet* 44, 1084-1089.
5. Yang, J., Lee, S.H., Goddard, M.E., and Visscher, P.M. (2011). GCTA: a tool for genome-wide complex trait analysis. *Am J Hum Genet* 88, 76-82.
6. Parks, B.W., Nam, E., Org, E., Kostem, E., Norheim, F., Hui, S.T., Pan, C., Civelek, M., Rau, C.D., Bennett, B.J., et al. (2013). Genetic control of obesity and gut microbiota composition in response to high-fat, high-sucrose diet in mice. *Cell Metab* 17, 141-152.
7. Parks, B.W., Sallam, T., Mehrabian, M., Psychogios, N., Hui, S.T., Norheim, F., Castellani, L.W., Rau, C.D., Pan, C., Phun, J., et al. (2015). Genetic architecture of insulin resistance in the mouse. *Cell Metab* 21, 334-346.
8. Morris, A.P., Voight, B.F., Teslovich, T.M., Ferreira, T., Segre, A.V., Steinthorsdottir, V., Strawbridge, R.J., Khan, H., Grallert, H., Mahajan, A., et al. (2012). Large-scale association analysis provides insights into the genetic architecture and pathophysiology of type 2 diabetes. *Nat Genet* 44, 981-990.
